# Supplementary material for: Facile in situ synthesis of dendrite-like ZnO/ZnTe core/shell nanorod heterostructures for sensitized solar cells
Source: Royal Society of Chemistry journal article supplement (doi:10.1039/c6tc00524a), 2016-01-01
Supplement: c6tc00524a1.pdf [file c6tc00524a1.pdf]

## **Facile in situ synthesis of dendrite-like ZnO/ZnTe core/shell nanorod heterostructure for sensitized solar cells**

*Songping Luo, <sup>a</sup> Heping Shen, <sup>a</sup> Xiaoli He, <sup>a</sup> Ye Zhang, <sup>a</sup> Jianbao Li, <sup>a, b</sup> Dan Oron, <sup>c, \*</sup>*

*Hong Lin <sup>a, \*</sup>*

<sup>a</sup> State Key Laboratory of New Ceramics & Fine Processing, School of Materials Science and Engineering, Tsinghua University, Beijing 100084, China

<sup>b</sup> Key Laboratory of Ministry of Education for Application Technology of Chemical Materials in Hainan Superior Resources, College of Materials Science and Chemical Engineering, Hainan University, Hainan 570228, China

<sup>c</sup> Department of Physics of Complex Systems, Weizmann Institute of Science, Rehovot 76100, Israel

**\*Corresponding Author:** hong-lin@tsinghua.edu.cn or dan.oron@weizmann.ac.il

## Supporting Information

1. XRD patterns of ZnO/ZnTe on FTO glass, ZnTe nanotubes on FTO glass and a FTO-coated glass substrate.

ZnTe nanotubes on FTO glass showed only characteristic peaks from FTO and ZnTe nanocrystals, revealing the ZnO nanorods were removed thoroughly.

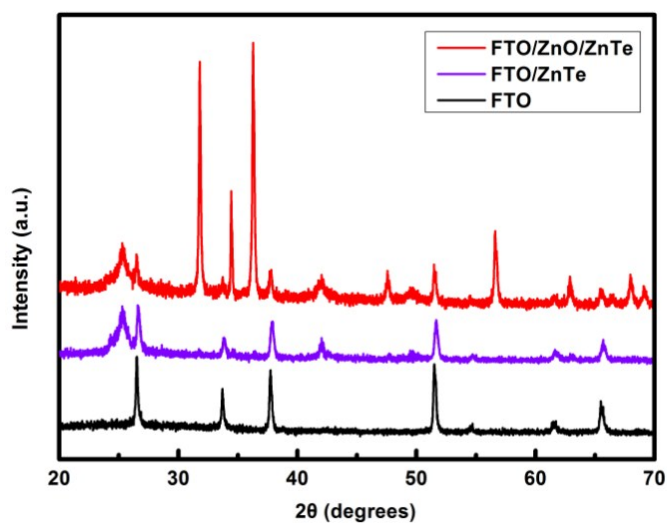

Fig S1 XRD patterns of ZnO/ZnTe on FTO glass, ZnTe nanotubes on FTO glass and a FTO-coated glass substrate.

2. Atomic percentage of Zn, Te, O elements

Table S1. Atomic percentage of Zn, Te, O elements in ZnTe, ZnO, and ZnO/ZnTe

| Sample    | C (Atom %) | O (Atom %)   | Zn (Atom %)  | Te (Atom %)  |
|-----------|------------|--------------|--------------|--------------|
| ZnO       | 31.70      | 35.19 ± 7.04 | 33.11 ± 6.62 | /            |
| ZnTe      | 6.51       | 15.31 ± 3.06 | 32.92 ± 9.05 | 45.25 ± 9.05 |
| ZnO/ ZnTe | 22.18      | 27.01 ± 5.40 | 31.21 ± 6.24 | 19.59 ± 3.92 |

### 3. Absorption spectra

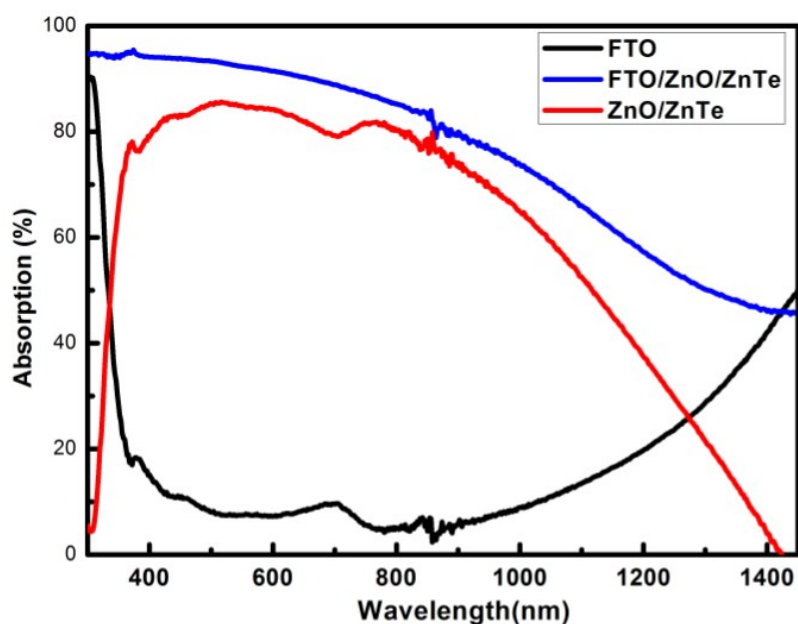

Fig. S2 UV-vis-NIR absorption spectrum of FTO substrate, FTO/ZnO/ZnTe and ZnO/ZnTe heterostructure (using bare conductive glass as reference)

### 4. Incident monochromatic photon-to-current conversion efficiency (IPCE) spectra

The IPCE spectra measurements were carried out by the IPCE measurement system (QEX10 PV, PV Measurements Inc., USA). As shown in Figure S3, the IPCE curves have clear response from the wavelength of 300 nm~1400 nm, consistent with the absorption spectrum of ZnO/ZnTe (Figure S2). It is also noted that ZnS layer improved the IPCE values, which is in good agreement with the trend in  $J_{sc}$  values.

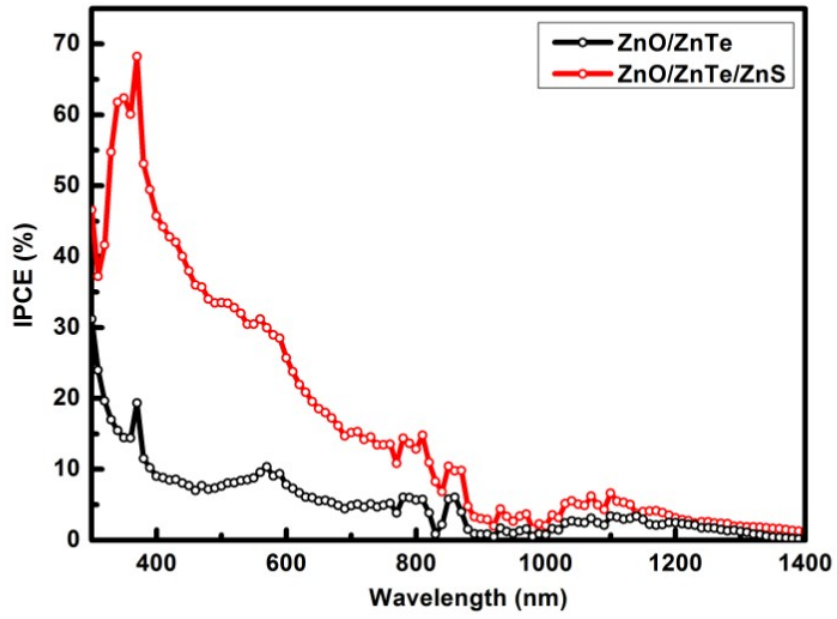

Fig. S3 IPCE curves of solar cells based on ZnO/ZnTe and ZnO/ZnTe/ZnS photoanodes.
